# Supplementary material
Source: Springer Nature journal article supplement (https://www.springermedizin.de/resource/supplementary/13221_2014_83_MOESM13_ESM.pdf/9680924)

A

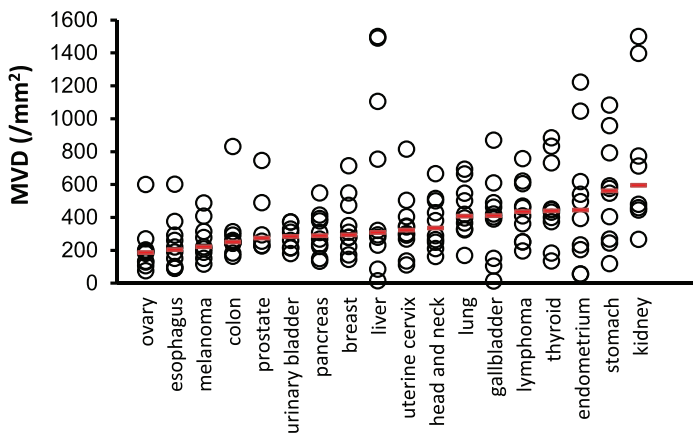

B

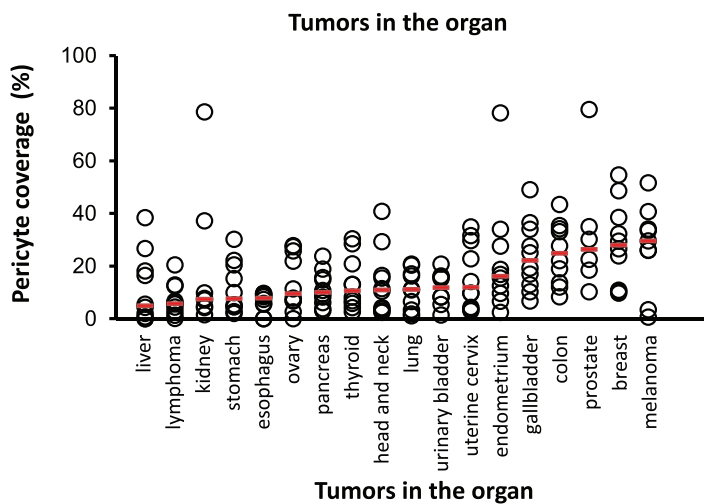

C

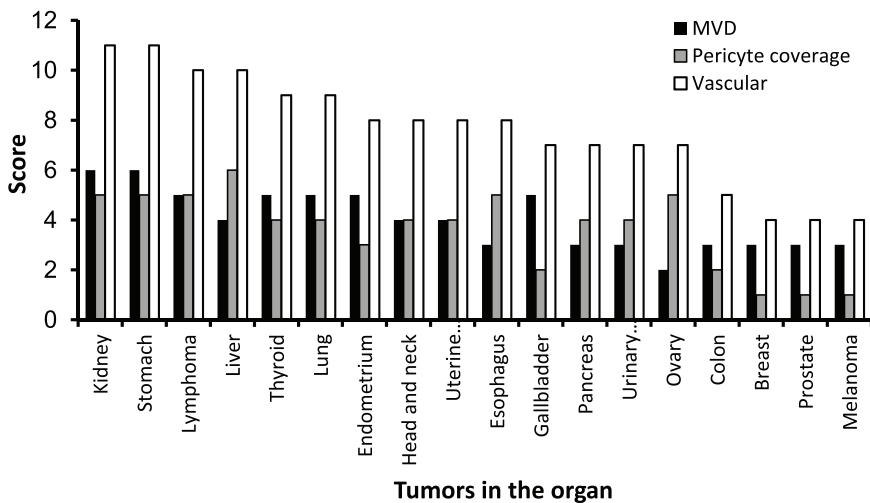

Supplement: MOESM13 [file 9680924]
